# Supplementary material for: Influence of Technological Parameters on the Size of Benzocaine Particles in Ointments Formulated on Selected Bases
Source: MDPI journal article supplement (doi:10.3390/app13042052), 2023-02-04
Supplement: s1 [file s1]

**Supplementary tables:****Table S1.** Change in particle size of benzocaine in ointment prepared on Pentravan® base, depending on storage time.

| Formulation code | Time [days]       | Percentage of individual benzocaine particles in the sample [%] |               |              |              | P≤   |
|------------------|-------------------|-----------------------------------------------------------------|---------------|--------------|--------------|------|
|                  |                   | <30µm                                                           | 31-60µm       | 61-90µm      | >91µm        |      |
| P-1              | after preparation | 72.50 ± 0.67                                                    | 16.83 ± 0.83  | 9.00 ± 0.67  | 1.67 ± 0.78  |      |
|                  | 7                 | 70.00 ± 0.67                                                    | 26.50 ± 0.67  | 3.33 ± 0.44  | 0.33 ± 0.44  |      |
|                  | 14                | 68.50 ± 0.50                                                    | 17.83 ± 0.56  | 12.00 ± 0.33 | 1.67 ± 0.44  |      |
|                  | 21                | 66.33 ± 0.78                                                    | 19.67 ± 0.78  | 12.00 ± 0.67 | 2.00 ± 0.33  |      |
|                  | 28                | 58.83 ± 0.56*                                                   | 25.00 ± 0.67* | 7.83 ± 0.56* | 8.33 ± 0.44* | 0.01 |
| P-2              | after preparation | 78.33 ± 0.67                                                    | 19.67 ± 0.78  | 2.00 ± 0.67  | 0.17 ± 0.28  |      |
|                  | 7                 | 74.50 ± 0.83                                                    | 21.83 ± 0.89  | 4.17 ± 0.56  | 0.17 ± 0.28  |      |
|                  | 14                | 71.67 ± 0.78                                                    | 24.67 ± 1.22  | 3.67 ± 0.56  | 0.00 ± 0.00  |      |
|                  | 21                | 68.00 ± 1.00                                                    | 24.67 ± 1.89  | 7.33 ± 1.89  | 0.00 ± 0.00  |      |
|                  | 28                | 62.33 ± 0.78*                                                   | 23.67 ± 1.11* | 9.33 ± 1.00* | 4.67 ± 1.33* | 0.01 |
| P-3              | after preparation | 82.17 ± 1.22                                                    | 16.17 ± 0.61  | 1.67 ± 0.78  | 0.00 ± 0.00  |      |
|                  | 7                 | 92.00 ± 1.20                                                    | 6.00 ± 0.80   | 2.00 ± 0.80  | 0.00 ± 0.00  |      |
|                  | 14                | 80.83 ± 1.17                                                    | 17.33 ± 1.33  | 1.83 ± 0.89  | 0.00 ± 0.00  |      |
|                  | 21                | 82.67 ± 1.22                                                    | 13.17 ± 1.50  | 4.17 ± 0.89  | 0.00 ± 0.00  |      |
|                  | 28                | 69.83 ± 2.22*                                                   | 24.67 ± 1.00* | 5.50 ± 1.50* | 0.00 ± 0.00  | 0.01 |
| P-4              | after preparation | 9.83 ± 1.22                                                     | 6.00 ± 1.00   | 2.00 ± 1.00  | 0.00 ± 0.00  |      |
|                  | 7                 | 89.17 ± 0.89                                                    | 8.00 ± 0.33   | 2.83 ± 0.89  | 0.00 ± 0.00  |      |
|                  | 14                | 86.17 ± 0.89                                                    | 9.50 ± 1.33   | 4.00 ± 1.00  | 0.00 ± 0.00  |      |
|                  | 21                | 86.83 ± 1.50                                                    | 10.17 ± 0.93  | 3.67 ± 1.33  | 0.00 ± 0.00  |      |
|                  | 28                | 75.33 ± 1.00*                                                   | 20.00 ± 0.67* | 4.50 ± 1.50* | 0.00 ± 0.00  | 0.01 |
| P-5              | after preparation | 95.67 ± 0.78                                                    | 4.33 ± 0.78   | 0.00 ± 0.00  | 0.00 ± 0.00  |      |
|                  | 7                 | 92.00 ± 1.00                                                    | 8.00 ± 1.00   | 0.00 ± 0.00  | 0.00 ± 0.00  |      |
|                  | 14                | 92.67 ± 0.89                                                    | 7.67 ± 0.89   | 0.00 ± 0.00  | 0.00 ± 0.00  |      |
|                  | 21                | 93.00 ± 0.67                                                    | 5.50 ± 0.67   | 1.50 ± 0.83  | 0.00 ± 0.00  |      |
|                  | 28                | 89.83 ± 1.56*                                                   | 10.17 ± 1.56* | 0.00 ± 0.00  | 0.00 ± 0.00  | 0.01 |
| P-6              | after preparation | 96.00 ± 1.33                                                    | 4.00 ± 1.33   | 0.00 ± 0.00  | 0.00 ± 0.00  |      |
|                  | 7                 | 94.00 ± 2.00                                                    | 6.00 ± 1.67   | 0.00 ± 0.00  | 0.00 ± 0.00  |      |
|                  | 14                | 94.33 ± 1.67                                                    | 6.17 ± 1.50   | 0.00 ± 0.00  | 0.00 ± 0.00  |      |
|                  | 21                | 93.83 ± 0.89                                                    | 6.17 ± 0.89   | 0.00 ± 0.00  | 0.00 ± 0.00  |      |
|                  | 28                | 91.83 ± 1.83*                                                   | 6.33 ± 1.67*  | 1.83 ± 0.89  | 0.00 ± 0.00  | 0.01 |
| P-7              | after preparation | 88.00 ± 1.33                                                    | 10.00 ± 1.67  | 2.00 ± 1.00  | 0.00 ± 0.00  |      |
|                  | 7                 | 83.60 ± 1.68                                                    | 14.17 ± 1.22  | 2.00 ± 1.00  | 0.00 ± 0.00  |      |
|                  | 14                | 85.17 ± 1.50                                                    | 15.83 ± 1.17  | 2.00 ± 0.67  | 0.00 ± 0.00  |      |
|                  | 21                | 76.00 ± 2.00                                                    | 20.00 ± 2.00  | 4.00 ± 1.00  | 0.00 ± 0.00  |      |
|                  | 28                | 72.50 ± 2.33*                                                   | 24.67 ± 1.67* | 4.17 ± 0.89  | 0.00 ± 0.00  | 0.01 |
| P-8              | after preparation | 88.17 ± 1.50                                                    | 11.83 ± 1.50  | 0.00 ± 0.00  | 0.00 ± 0.00  |      |
|                  | 7                 | 85.83 ± 1.89                                                    | 14.17 ± 1.89  | 0.00 ± 0.00  | 0.00 ± 0.00  |      |
|                  | 14                | 82.00 ± 1.33                                                    | 18.00 ± 1.33  | 0.00 ± 0.00  | 0.00 ± 0.00  |      |
|                  | 21                | 79.67 ± 1.67                                                    | 18.33 ± 2.00  | 2.00 ± 0.67  | 0.00 ± 0.00  |      |
|                  | 28                | 75.83 ± 2.17*                                                   | 18.17 ± 1.56* | 2.00 ± 1.00* | 4.00 ± 1.00  | 0.01 |

\* Statistically significant (p≤0.01) compared to the sample immediately after preparation; n=6; M=mean; SD=standard deviation

**Table S 2.** Change in particle size of benzocaine in ointment prepared on Lekobaza base, depending on storage time.

| Formulation code | Time [days]       | Percentage of individual benzocaine particles in the sample [%] |               |              |             | P≤   |
|------------------|-------------------|-----------------------------------------------------------------|---------------|--------------|-------------|------|
|                  |                   | <30µm                                                           | 31-60µm       | 61-90µm      | >91µm       |      |
| L-9              | after preparation | 87.33 ± 1.33                                                    | 10.83 ± 1.17  | 1.83 ± 0.56  | 0.00 ± 0.00 |      |
|                  | 7                 | 80.17 ± 0.89                                                    | 16.00 ± 1.16  | 3.83 ± 0.89  | 0.00 ± 0.00 |      |
|                  | 14                | 77.17 ± 2.50                                                    | 20.00 ± 2.00  | 4.00 ± 0.67  | 0.00 ± 0.00 |      |
|                  | 21                | 63.83 ± 1.17                                                    | 31.83 ± 2.22  | 2.33 ± 1.00  | 2.00 ± 1.00 |      |
|                  | 28                | 63.67 ± 2.44*                                                   | 26.00 ± 2.00* | 8.33 ± 1.78* | 2.00 ± 1.00 | 0.01 |
| L-10             | after preparation | 88.00 ± 1.00                                                    | 12.00 ± 1.00  | 0.00 ± 0.00  | 0.00 ± 0.00 |      |
|                  | 7                 | 84.67 ± 1.22                                                    | 8.17 ± 1.50   | 6.33 ± 1.33  | 1.83 ± 0.89 |      |
|                  | 14                | 81.17 ± 1.11                                                    | 14.67 ± 0.78  | 2.33 ± 0.78  | 1.86 ± 0.89 |      |
|                  | 21                | 67.83 ± 1.83                                                    | 22.17 ± 1.22  | 4.00 ± 0.67  | 6.00 ± 1.00 |      |
|                  | 28                | 68.50 ± 2.17*                                                   | 25.17 ± 1.50* | 4.17 ± 1.22  | 2.00 ± 1.00 | 0.01 |
| L-11             | after preparation | 94.00 ± 1.00                                                    | 6.00 ± 1.00   | 0.00 ± 0.00  | 0.00 ± 0.00 |      |
|                  | 7                 | 93.83 ± 0.83                                                    | 6.17 ± 0.89   | 0.00 ± 0.00  | 0.00 ± 0.00 |      |
|                  | 14                | 85.50 ± 1.00                                                    | 12.17 ± 0.89  | 2.33 ± 0.44  | 0.00 ± 0.00 |      |
|                  | 21                | 77.67 ± 1.33                                                    | 18.17 ± 1.17  | 4.17 ± 0.56  | 0.00 ± 0.00 |      |
|                  | 28                | 75.67 ± 1.33*                                                   | 20.17 ± 0.89* | 4.17 ± 0.56  | 0.00 ± 0.00 | 0.01 |
| L-12             | after preparation | 96.17 ± 0.89                                                    | 4.00 ± 1.00   | 0.00 ± 0.00  | 0.00 ± 0.00 |      |
|                  | 7                 | 96.25 ± 0.72                                                    | 4.33 ± 0.78   | 0.00 ± 0.00  | 0.00 ± 0.00 |      |
|                  | 14                | 92.67 ± 2.57                                                    | 6.17 ± 1.17   | 1.83 ± 0.89  | 0.00 ± 0.00 |      |
|                  | 21                | 80.17 ± 2.89                                                    | 13.83 ± 1.56  | 4.00 ± 1.00  | 2.00 ± 1.00 |      |
|                  | 28                | 85.00 ± 3.00*                                                   | 10.67 ± 1.67* | 2.33 ± 0.78  | 2.00 ± 1.00 | 0.01 |
| L-13             | after preparation | 88.80 ± 1.44                                                    | 11.50 ± 1.50  | 0.00 ± 0.00  | 0.00 ± 0.00 |      |
|                  | 7                 | 75.50 ± 1.83                                                    | 18.17 ± 1.83  | 6.33 ± 1.00  | 0.00 ± 0.00 |      |
|                  | 14                | 86.17 ± 2.17                                                    | 11.83 ± 1.22  | 2.00 ± 1.00  | 0.00 ± 0.00 |      |
|                  | 21                | 68.67 ± 2.00                                                    | 23.67 ± 1.44  | 7.67 ± 1.44  | 0.00 ± 0.00 |      |
|                  | 28                | 64.00 ± 2.00*                                                   | 31.83 ± 1.56* | 4.17 ± 1.56  | 0.00 ± 0.00 | 0.01 |

\* Statistically significant (p≤0.01) compared to the sample immediately after preparation; n=6; M-mean; SD-standard deviation

**Table S3.** Change in particle size of benzocaine in ointment prepared on Lekobaza LUX base, depending on storage time.

| Formulation code | Time [days]       | Percentage of individual benzocaine particles in the sample [%] |               |              |             | P≤   |
|------------------|-------------------|-----------------------------------------------------------------|---------------|--------------|-------------|------|
|                  |                   | <30µm                                                           | 31-60µm       | 61-90µm      | >91µm       |      |
| LLux-14          | after preparation | 89.60 ± 1.92                                                    | 8.50 ± 1.50   | 1.83 ± 1.17  | 0.00 ± 0.00 |      |
|                  | 7                 | 90.33 ± 1.67                                                    | 5.67 ± 1.56   | 4.00 ± 1.00  | 0.00 ± 0.00 |      |
|                  | 14                | 89.67 ± 1.78                                                    | 6.00 ± 1.00   | 4.33 ± 0.78  | 0.00 ± 0.00 |      |
|                  | 21                | 85.83 ± 1.17                                                    | 12.00 ± 1.33  | 2.17 ± 0.89  | 0.00 ± 0.00 |      |
|                  | 28                | 80.00 ± 2.00*                                                   | 18.00 ± 3.00* | 2.00 ± 1.00* | 0.00 ± 0.00 | 0.01 |
| LLux -15         | after preparation | 94.17 ± 0.89                                                    | 5.83 ± 0.89   | 0.00 ± 0.00  | 0.00 ± 0.00 |      |
|                  | 7                 | 91.33 ± 1.00                                                    | 6.83 ± 1.50   | 1.83 ± 0.89  | 0.00 ± 0.00 |      |
|                  | 14                | 81.83 ± 3.44                                                    | 17.83 ± 1.17  | 2.00 ± 0.67  | 0.00 ± 0.00 |      |
|                  | 21                | 88.00 ± 1.20                                                    | 12.00 ± 1.00  | 0.00 ± 0.00  | 0.00 ± 0.00 |      |
|                  | 28                | 85.83 ± 0.61*                                                   | 8.50 ± 1.50*  | 5.67 ± 1.00  | 0.00 ± 0.00 | 0.01 |
| LLux -16         | after preparation | 95.17 ± 1.22                                                    | 5.83 ± 1.17   | 0.00 ± 0.00  | 0.00 ± 0.00 |      |
|                  | 7                 | 94.00 ± 1.67                                                    | 6.00 ± 1.67   | 0.00 ± 0.00  | 0.00 ± 0.00 |      |
|                  | 14                | 90.83 ± 3.50                                                    | 8.00 ± 1.00   | 1.83 ± 0.89  | 0.00 ± 0.00 |      |
|                  | 21                | 89.67 ± 3.00                                                    | 8.33 ± 2.00   | 2.00 ± 1.00  | 0.00 ± 0.00 |      |
|                  | 28                | 87.67 ± 1.44*                                                   | 8.50 ± 1.50*  | 3.83 ± 0.89  | 0.00 ± 0.00 | 0.01 |
| LLux -17         | after preparation | 96.33 ± 1.33                                                    | 3.67 ± 1.33   | 0.00 ± 0.00  | 0.00 ± 0.00 |      |
|                  | 7                 | 94.33 ± 0.78                                                    | 5.67 ± 0.78   | 0.00 ± 0.00  | 0.00 ± 0.00 |      |
|                  | 14                | 92.17 ± 1.17                                                    | 7.83 ± 1.17   | 0.00 ± 0.00  | 0.00 ± 0.00 |      |
|                  | 21                | 98.00 ± 1.00                                                    | 2.00 ± 1.00   | 0.00 ± 0.00  | 0.00 ± 0.00 |      |
|                  | 28                | 92.23 ± 1.33*                                                   | 7.67 ± 1.33*  | 0.00 ± 0.00  | 0.00 ± 0.00 | 0.01 |
| LLux -18         | after preparation | 92.17 ± 1.17                                                    | 7.83 ± 1.17   | 0.00 ± 0.00  | 0.00 ± 0.00 |      |
|                  | 7                 | 92.00 ± 1.67                                                    | 6.00 ± 1.00   | 2.00 ± 1.00  | 0.00 ± 0.00 |      |
|                  | 14                | 89.83 ± 1.22                                                    | 7.83 ± 1.17   | 2.33 ± 0.78  | 0.00 ± 0.00 |      |
|                  | 21                | 89.83 ± 1.50                                                    | 7.67 ± 1.00   | 2.50 ± 1.17  | 0.00 ± 0.00 |      |
|                  | 28                | 92.17 ± 1.83                                                    | 7.83 ± 1.83   | 0.00 ± 0.00  | 0.00 ± 0.00 |      |

\* Statistically significant (p≤0.01) compared to the sample immediately after preparation; n=6; M-mean; SD-standard deviation

**Table S4.** Change in particle size of benzocaine in ointment prepared on Euceryna base, depending on storage time.

| Formulation code | Time [days]       | Percentage of individual benzocaine particles in the sample [%] |               |               |               | P≤   |
|------------------|-------------------|-----------------------------------------------------------------|---------------|---------------|---------------|------|
|                  |                   | <30µm                                                           | 31-60µm       | 61-90µm       | >91µm         |      |
| E-19             | after preparation | 47.67 ± 1.11                                                    | 17.83 ± 1.56  | 10.67 ± 2.00  | 23.83 ± 2.22  |      |
|                  | 7                 | 44.17 ± 1.83                                                    | 22.33 ± 1.11  | 11.83 ± 1.17  | 21.67 ± 1.33  |      |
|                  | 14                | 42.00 ± 1.00                                                    | 28.33 ± 1.44  | 13.17 ± 1.17  | 18.17 ± 1.83  |      |
|                  | 21                | 40.33 ± 1.44                                                    | 25.83 ± 0.89  | 20.00 ± 1.00  | 14.33 ± 1.00  |      |
|                  | 28                | 38.17 ± 1.17*                                                   | 30.17 ± 0.89* | 15.50 ± 1.50* | 16.00 ± 0.67* | 0.01 |
| E-20             | after preparation | 49.00 ± 2.33                                                    | 26.00 ± 1.00  | 10.17 ± 0.89  | 14.17 ± 1.17  |      |
|                  | 7                 | 46.00 ± 1.33                                                    | 23.67 ± 1.44  | 14.17 ± 1.22  | 16.17 ± 1.22  |      |
|                  | 14                | 43.83 ± 2.56                                                    | 32.00 ± 1.00  | 13.83 ± 1.56  | 10.33 ± 0.78  |      |
|                  | 21                | 43.67 ± 1.11                                                    | 32.00 ± 1.00  | 12.50 ± 1.50  | 11.83 ± 1.22  |      |
|                  | 28                | 44.00 ± 2.67*                                                   | 23.83 ± 1.17  | 20.17 ± 1.17* | 12.00 ± 1.00* | 0.01 |
| E-21             | after preparation | 85.83 ± 0.83                                                    | 14.17 ± 0.83  | 0.00 ± 0.00   | 0.00 ± 0.00   |      |
|                  | 7                 | 81.50 ± 1.17                                                    | 14.33 ± 0.67  | 4.17 ± 0.89   | 0.00 ± 0.00   |      |
|                  | 14                | 79.50 ± 0.83                                                    | 18.17 ± 0.56  | 2.33 ± 0.44   | 0.00 ± 0.00   |      |
|                  | 21                | 77.67 ± 0.67                                                    | 20.17 ± 0.56  | 2.17 ± 0.56   | 0.00 ± 0.00   |      |
|                  | 28                | 73.67 ± 0.78*                                                   | 18.17 ± 0.89* | 8.17 ± 0.56   | 0.00 ± 0.00   | 0.01 |
| E-22             | after preparation | 89.67 ± 1.11                                                    | 8.17 ± 0.56   | 2.17 ± 0.56   | 0.00 ± 0.00   |      |
|                  | 7                 | 85.67 ± 0.11                                                    | 10.17 ± 1.17  | 4.17 ± 0.56   | 0.00 ± 0.00   |      |
|                  | 14                | 83.83 ± 0.89                                                    | 16.17 ± 0.89  | 0.00 ± 0.00   | 0.00 ± 0.00   |      |
|                  | 21                | 83.67 ± 1.11                                                    | 12.17 ± 0.89  | 4.17 ± 0.89   | 0.00 ± 0.00   |      |
|                  | 28                | 77.67 ± 1.44*                                                   | 14.17 ± 0.89* | 8.17 ± 0.89*  | 0.00 ± 0.00   | 0.01 |
| E-23             | after preparation | 93.83 ± 0.56                                                    | 6.17 ± 0.56   | 0.00 ± 0.00   | 0.00 ± 0.00   |      |
|                  | 7                 | 86.33 ± 3.56                                                    | 8.17 ± 0.89   | 2.17 ± 0.89   | 0.00 ± 0.00   |      |
|                  | 14                | 89.50 ± 1.33                                                    | 6.33 ± 0.78   | 4.17 ± 0.89   | 0.00 ± 0.00   |      |
|                  | 21                | 91.83 ± 0.89                                                    | 8.17 ± 0.89   | 0.00 ± 0.00   | 0.00 ± 0.00   |      |
|                  | 28                | 87.67 ± 0.79*                                                   | 6.17 ± 0.89   | 6.17 ± 0.89   | 0.00 ± 0.00   | 0.01 |
| E-24             | after preparation | 97.83 ± 0.89                                                    | 2.17 ± 0.89   | 0.00 ± 0.00   | 0.00 ± 0.00   |      |
|                  | 7                 | 93.83 ± 0.89                                                    | 6.17 ± 0.89   | 0.00 ± 0.00   | 0.00 ± 0.00   |      |
|                  | 14                | 91.83 ± 0.89                                                    | 8.17 ± 0.89   | 0.00 ± 0.00   | 0.00 ± 0.00   |      |
|                  | 21                | 93.67 ± 0.44                                                    | 4.17 ± 0.56   | 2.17 ± 0.89   | 0.00 ± 0.00   |      |
|                  | 28                | 90.67 ± 0.67*                                                   | 9.33 ± 0.67*  | 0.00 ± 0.00   | 0.00 ± 0.00   | 0.01 |

\* Statistically significant (p≤0.01) compared to the sample immediately after preparation; n=6; M=mean; SD=standard deviation

**Table S5.** Change in particle size of benzocaine in ointment prepared on Nourivan™ Antiox or Fitalite™ base, depending on storage time.

| Formulation code | Time [days]       | Percentage of individual benzocaine particles in the sample [%] |               |               |              | P≤   |
|------------------|-------------------|-----------------------------------------------------------------|---------------|---------------|--------------|------|
|                  |                   | <30µm                                                           | 31-60µm       | 61-90µm       | >91µm        |      |
| N-25             | after preparation | 73.33 ± 1.89                                                    | 22.17 ± 1.17  | 2.17 ± 0.89   | 2.00 ± 0.67  |      |
|                  | 7                 | 67.50 ± 1.50                                                    | 28.17 ± 0.89  | 2.17 ± 0.89   | 2.17 ± 0.56  |      |
|                  | 14                | 69.50 ± 1.50                                                    | 28.17 ± 0.89  | 2.33 ± 1.11   | 0.00 ± 0.00  |      |
|                  | 21                | 70.83 ± 0.83                                                    | 17.67 ± 1.00  | 11.50 ± 1.00  | 0.00 ± 0.00  |      |
|                  | 28                | 59.33 ± 2.22*                                                   | 20.33 ± 1.33  | 14.17 ± 1.22* | 6.17 ± 0.89* | 0.01 |
| N-26             | after preparation | 79.33 ± 2.89                                                    | 18.33 ± 2.11  | 2.33 ± 0.78   | 0.00 ± 0.00  |      |
|                  | 7                 | 73.67 ± 1.33                                                    | 22.17 ± 0.83  | 4.17 ± 0.89   | 0.00 ± 0.00  |      |
|                  | 14                | 75.67 ± 1.44                                                    | 20.17 ± 1.17  | 4.17 ± 1.22   | 0.00 ± 0.00  |      |
|                  | 21                | 77.67 ± 1.78                                                    | 12.17 ± 0.89  | 10.17 ± 1.22  | 0.00 ± 0.00  |      |
|                  | 28                | 65.50 ± 0.83*                                                   | 16.17 ± 0.89* | 16.17 ± 0.56* | 2.17 ± 0.89  | 0.01 |
| F-27             | after preparation | 75.67 ± 1.78                                                    | 18.17 ± 1.17  | 6.17 ± 0.89   | 0.00 ± 0.00  |      |
|                  | 7                 | 69.67 ± 1.33                                                    | 24.17 ± 1.17  | 6.17 ± 0.89   | 0.00 ± 0.00  |      |
|                  | 14                | 67.67 ± 1.00                                                    | 26.17 ± 0.56  | 6.17 ± 0.89   | 0.00 ± 0.00  |      |
|                  | 21                | 60.33 ± 2.44                                                    | 19.83 ± 1.83  | 17.83 ± 1.17  | 2.00 ± 1.00  |      |
|                  | 28                | 35.83 ± 1.17*                                                   | 45.83 ± 0.89* | 14.17 ± 1.22* | 4.17 ± 1.22  | 0.01 |
| F-28             | after preparation | 75.67 ± 1.44                                                    | 22.17 ± 0.89  | 2.17 ± 0.89   | 0.00 ± 0.00  |      |
|                  | 7                 | 71.67 ± 1.78                                                    | 22.17 ± 1.17  | 6.17 ± 0.89   | 0.00 ± 0.00  |      |
|                  | 14                | 69.50 ± 1.77                                                    | 24.17 ± 0.89  | 6.33 ± 0.78   | 0.00 ± 0.00  |      |
|                  | 21                | 67.67 ± 1.78                                                    | 18.33 ± 1.78  | 14.00 ± 1.00  | 0.00 ± 0.00  |      |
|                  | 28                | 62.00 ± 1.33*                                                   | 18.17 ± 0.89* | 17.83 ± 0.56* | 2.00 ± 1.00  | 0.01 |

\* Statistically significant ( $p \leq 0.01$ ) compared to the sample immediately after preparation; n=6; M-mean; SD-standard deviation

**Table S6.** Change in benzocaine particle size in emulsion ointments depending on the used base and storage time.

| Formulation code | Time [days]       | Percentage of individual benzocaine particles in the sample [%] |              |             |             |
|------------------|-------------------|-----------------------------------------------------------------|--------------|-------------|-------------|
|                  |                   | <30µm                                                           | 31-60µm      | 61-90µm     | >91µm       |
| P-E-29           | after preparation | 0.00 ± 0.00                                                     | 0.00 ± 0.00  | 0.00 ± 0.00 | 0.00 ± 0.00 |
|                  | 7                 | 0.00 ± 0.00                                                     | 0.00 ± 0.00  | 0.00 ± 0.00 | 0.00 ± 0.00 |
|                  | 14                | 0.00 ± 0.00                                                     | 0.00 ± 0.00  | 0.00 ± 0.00 | 0.00 ± 0.00 |
|                  | 21                | 0.00 ± 0.00                                                     | 0.00 ± 0.00  | 0.00 ± 0.00 | 0.00 ± 0.00 |
|                  | 28                | 0.00 ± 0.00                                                     | 0.00 ± 0.00  | 0.00 ± 0.00 | 0.00 ± 0.00 |
| P-E-30           | after preparation | 0.00 ± 0.00                                                     | 0.00 ± 0.00  | 0.00 ± 0.00 | 0.00 ± 0.00 |
|                  | 7                 | 0.00 ± 0.00                                                     | 0.00 ± 0.00  | 0.00 ± 0.00 | 0.00 ± 0.00 |
|                  | 14                | 0.00 ± 0.00                                                     | 0.00 ± 0.00  | 0.00 ± 0.00 | 0.00 ± 0.00 |
|                  | 21                | 0.00 ± 0.00                                                     | 0.00 ± 0.00  | 0.00 ± 0.00 | 0.00 ± 0.00 |
|                  | 28                | 0.00 ± 0.00                                                     | 0.00 ± 0.00  | 0.00 ± 0.00 | 0.00 ± 0.00 |
| L-E-31           | after preparation | 0.00 ± 0.00                                                     | 0.00 ± 0.00  | 0.00 ± 0.00 | 0.00 ± 0.00 |
|                  | 7                 | 0.00 ± 0.00                                                     | 0.00 ± 0.00  | 0.00 ± 0.00 | 0.00 ± 0.00 |
|                  | 14                | 0.00 ± 0.00                                                     | 0.00 ± 0.00  | 0.00 ± 0.00 | 0.00 ± 0.00 |
|                  | 21                | 0.00 ± 0.00                                                     | 0.00 ± 0.00  | 0.00 ± 0.00 | 0.00 ± 0.00 |
|                  | 28                | 0.00 ± 0.00                                                     | 0.00 ± 0.00  | 0.00 ± 0.00 | 0.00 ± 0.00 |
| L-E-32           | after preparation | 0.00 ± 0.00                                                     | 0.00 ± 0.00  | 0.00 ± 0.00 | 0.00 ± 0.00 |
|                  | 7                 | 0.00 ± 0.00                                                     | 0.00 ± 0.00  | 0.00 ± 0.00 | 0.00 ± 0.00 |
|                  | 14                | 0.00 ± 0.00                                                     | 0.00 ± 0.00  | 0.00 ± 0.00 | 0.00 ± 0.00 |
|                  | 21                | 0.00 ± 0.00                                                     | 0.00 ± 0.00  | 0.00 ± 0.00 | 0.00 ± 0.00 |
|                  | 28                | 0.00 ± 0.00                                                     | 0.00 ± 0.00  | 0.00 ± 0.00 | 0.00 ± 0.00 |
| LLX-E-33         | after preparation | rw*                                                             | rw           | rw          | rw          |
|                  | 7                 | rw                                                              | rw           | rw          | rw          |
|                  | 14                | rw                                                              | rw           | rw          | rw          |
|                  | 21                | rw                                                              | rw           | rw          | rw          |
|                  | 28                | rw                                                              | rw           | rw          | rw          |
| LLX-E-34         | after preparation | rw                                                              | rw           | rw          | rw          |
|                  | 7                 | rw                                                              | rw           | rw          | rw          |
|                  | 14                | rw                                                              | rw           | rw          | rw          |
|                  | 21                | rw                                                              | rw           | rw          | rw          |
|                  | 28                | rw                                                              | rw           | rw          | rw          |
| E-E-35           | after preparation | 0.00 ± 0.00                                                     | 0.00 ± 0.00  | 0.00 ± 0.00 | 0.00 ± 0.00 |
|                  | 7                 | 100.00 ± 0.00                                                   | 0.00 ± 0.00  | 0.00 ± 0.00 | 0.00 ± 0.00 |
|                  | 14                | 80.00 ± 1.00                                                    | 12.00 ± 1.00 | 0.00 ± 0.00 | 0.00 ± 0.00 |
|                  | 21                | 92.00 ± 1.00                                                    | 6.33 ± 1.11  | 1.67 ± 0.78 | 0.00 ± 0.00 |
|                  | 28                | 76.17 ± 0.89                                                    | 17.83 ± 1.22 | 4.00 ± 1.00 | 2.00 ± 0.33 |
| E-E-36           | after preparation | 0.00 ± 0.00                                                     | 0.00 ± 0.00  | 0.00 ± 0.00 | 0.00 ± 0.00 |
|                  | 7                 | 94.50 ± 1.50                                                    | 5.50 ± 1.50  | 0.00 ± 0.00 | 0.00 ± 0.00 |
|                  | 14                | 86.00 ± 1.00                                                    | 12.00 ± 0.33 | 2.00 ± 0.67 | 0.00 ± 0.00 |
|                  | 21                | 76.83 ± 1.17                                                    | 15.83 ± 0.28 | 7.33 ± 1.00 | 0.00 ± 0.00 |
|                  | 28                | 68.83 ± 0.89                                                    | 20.00 ± 1.00 | 4.33 ± 0.78 | 7.83 ± 0.89 |
| N-E-37           | after preparation | 0.00 ± 0.00                                                     | 0.00 ± 0.00  | 0.00 ± 0.00 | 0.00 ± 0.00 |
|                  | 7                 | 100.00 ± 0.00                                                   | 0.00 ± 0.00  | 0.00 ± 0.00 | 0.00 ± 0.00 |
|                  | 14                | 98.29 ± 0.78                                                    | 1.71 ± 0.78  | 0.00 ± 0.00 | 0.00 ± 0.00 |
|                  | 21                | 96.50 ± 0.83                                                    | 3.67 ± 0.78  | 0.00 ± 0.00 | 0.00 ± 0.00 |
|                  | 28                | 94.17 ± 0.56                                                    | 5.83 ± 0.56  | 0.00 ± 0.00 | 0.00 ± 0.00 |
| N-E-38           | after preparation | 0.00 ± 0.00                                                     | 0.00 ± 0.00  | 0.00 ± 0.00 | 0.00 ± 0.00 |
|                  | 7                 | 98.00 ± 0.67                                                    | 2.00 ± 0.67  | 0.00 ± 0.00 | 0.00 ± 0.00 |
|                  | 14                | 97.83 ± 0.56                                                    | 2.17 ± 0.56  | 0.00 ± 0.00 | 0.00 ± 0.00 |
|                  | 21                | 92.17 ± 0.89                                                    | 7.83 ± 0.89  | 0.00 ± 0.00 | 0.00 ± 0.00 |

|        |                   |              |              |             |             |
|--------|-------------------|--------------|--------------|-------------|-------------|
|        | 28                | 90.00 ± 1.00 | 10.00 ± 1.00 | 0.00 ± 0.00 | 0.00 ± 0.00 |
| F-E-39 | after preparation | 0.00 ± 0.00  | 0.00 ± 0.00  | 0.00 ± 0.00 | 0.00 ± 0.00 |
|        | 7                 | 100 ± 0.00   | 0.00 ± 0.00  | 0.00 ± 0.00 | 0.00 ± 0.00 |
|        | 14                | 92.00 ± 1.00 | 7.83 ± 0.83  | 0.00 ± 0.00 | 0.00 ± 0.00 |
|        | 21                | 89.83 ± 1.22 | 10.17 ± 1.22 | 0.00 ± 0.00 | 0.00 ± 0.00 |
|        | 28                | 88.55 ± 1.50 | 9.67 ± 1.67  | 1.83 ± 0.56 | 0.00 ± 0.00 |
| F-E-40 | after preparation | 0.00 ± 0.00  | 0.00 ± 0.00  | 0.00 ± 0.00 | 0.00 ± 0.00 |
|        | 7                 | 97.83 ± 0.56 | 2.17 ± 0.56  | 0.00 ± 0.00 | 0.00 ± 0.00 |
|        | 14                | 87.83 ± 0.89 | 12.17 ± 0.89 | 0.00 ± 0.00 | 0.00 ± 0.00 |
|        | 21                | 8.83 ± 1.17  | 18.17 ± 1.17 | 0.00 ± 0.00 | 0.00 ± 0.00 |
|        | 28                | 86.00 ± 1.00 | 10.00 ± 1.33 | 4.00 ± 0.33 | 0.00 ± 0.00 |

\* Statistically significant ( $p \leq 0.01$ ) compared to the sample immediately after preparation; n=6; M=mean; SD=standard deviation.
